# *Stress gene responses in amphipods to cadmium*

**Title:** Investigation of cellular stress response related heat shock protein *hsp70*/Hsp70 and multixenobiotic transporter *abcb1* in Siberian freshwater amphipods upon cadmium exposure

**Authors:** Marina V. Protopopova<sup>1\*</sup>, Vasiliy V. Pavlichenko<sup>1\*\*</sup>, Till Luckenbach<sup>2\*\*\*</sup>

**Affiliations:** <sup>1</sup> Siberian Institute of Plant Physiology and Biochemistry SB RAS, Lermontov str., 132, 664033 Irkutsk, Russia; <sup>2</sup> Department of Bioanalytical Ecotoxicology, UFZ-Helmholtz Centre for Environmental Research (UFZ), Permoserstraße 15, D-04318 Leipzig, Germany

**Contact data:** \*marina.v.protopopova@gmail.com; \*\*vpavlichenko@gmail.com; \*\*\*till.luckenbach@ufz.de (corresponding author)

# *Stress gene responses in amphipods to cadmium*

**Abstract:** Induction of stress response genes *hsp70* and *abcb1* and Hsp70 protein by cadmium chloride (CdCl<sub>2</sub>) was explored in amphipod species with different stress adaptation strategies from the Lake Baikal area. Based on lethal concentrations (LC) the sensitivities to CdCl<sub>2</sub> were ranked (24 hr LC50 – mg/L CdCl<sub>2</sub>): *Gammarus lacustris* (1.7) < *Eulimnogammarus cyaneus* (2.9) < *E. verrucosus* (8.3) < *E. vittatus* (18.2). Conjugated dienes indicating lipid peroxidation were significantly increased by 5 mg/L CdCl<sub>2</sub> (24 hr exposure) only in *G. lacustris* and *E. cyaneus*. Upon treatment with 0.54 – 5.8 mg/L CdCl<sub>2</sub> *hsp70* transcript levels were more increased in the toxicologically more sensitive species. Relating the exposure concentrations to LCx values revealed that across the species the increases of *hsp70* transcript levels were comparatively low (up to 2.6-fold) up to LC50; at higher LCx values *hsp70* induction was more pronounced (up to a 9.1-fold by 5 mg/L CdCl<sub>2</sub> (≅LC70) in *E. cyaneus*). In contrast, *abcb1* inductions did not correspond with CdCl<sub>2</sub> LCx values across species; *abcb1* induction was highest (4.7-fold) in *E. verrucosus* by 5.0 mg/L CdCl<sub>2</sub> (≅LC45, 24 hr exposure). Induction of stress gene responses by lethal CdCl<sub>2</sub> concentrations indicates that in the amphipods they are rather insensitive.

**Key words:** conjugated dienes, heavy metal, Lake Baikal, P-glycoprotein, stress protein

# *Stress gene responses in amphipods to cadmium*

## **Introduction**

Cadmium is a non-essential heavy-metal that reaches the environment *via* various anthropogenic and natural sources and at low concentrations causes poisoning in humans and wildlife [1]. Toxic cadmium effects have often been attributed with increased levels of reactive oxygen species (ROS) and reactive nitrogen species (RNS) causing damages of biological macromolecules such as proteins [2]. Exposure to cadmium was found to lead to the induction of cellular stress response genes *hsp70* [3-12] and *abcb1* [13, 14] in a range of aquatic organisms. This induction of *hsp70* and *abcb1* by cadmium can be related to the increased abundance of damaged cellular macromolecules such as cellular membrane fragments or misfolded proteins [15, 16].

Lake Baikal in Eastern Siberia, the oldest, deepest and by volume largest lake in the world, is a biodiversity hotspot with high degrees of endemism of species [17, 18]. Baikal's water is generally highly pristine, however, the risk of water contamination by heavy metals is increasing especially through the Selenga river, which is the largest tributary of Lake Baikal and comprises almost half of the riverine inflow into the lake [19, 20]. Amphipods are a dominant taxon of the benthic communities of Lake Baikal and the more than 350 endemic species and subspecies represent 45.3% of all freshwater amphipod species of the world [21, 22]. The numerous phylogenetically closely related species featuring a range of adaptation strategies are interesting models for comparative studies [23]. In the here studied amphipod species constitutive expression levels of cellular stress response genes vary within an order of magnitude which could be related with differences across species regarding stress tolerance. Thus, constitutive *hsp70* levels relate to the species-specific differences in thermotolerance [24-26]. Furthermore, species-specific degrees of gene responses of *hsp70*

# *Stress gene responses in amphipods to cadmium*

and *abcb1* to organic compounds as humic substances [25] and phenanthrene [27] were found.

It is stated in many studies on the effects of cadmium on *hsp70*/Hsp70 levels that the test organisms were exposed to sublethal cadmium levels but the published molecular effect data are generally not related to the general level of stress caused by the cadmium concentration applied, such as lethal cadmium concentrations. It is thus unclear how sensitive the observed gene response to cadmium is.

We therefore here addressed the question at which stress levels cellular stress response genes *hsp70* and *abcb1* are induced upon exposure to CdCl<sub>2</sub> in amphipod species with different cellular stress response capacities. The lethal concentrations (LCx 24h) of CdCl<sub>2</sub> served as a measure for the cadmium-related stress levels. Transcript levels of *hsp70* and *abcb1* were quantified *via* quantitative polymerase chain reaction (qPCR) in RNA extracted from tissue of amphipods upon exposures of up to 24 hrs to different CdCl<sub>2</sub> concentrations. The study was performed with four amphipod species that differ with regard to their ecological preferences and habitats and accordingly with their physiological and cellular adaptations to environmental conditions. Three of the species are littoral amphipods from Lake Baikal belonging to the *Eulinogammarus* genus; the Holarctic species *Gammarus lacustris* that occurs in waters connected to Lake Baikal but not in areas of the lake inhabited by endemic fauna was also examined.

## **Materials and Methods**

# *Stress gene responses in amphipods to cadmium*

## *Studied species and animal sampling*

The experimental species were *Eulimnogammarus cyaneus* (Dyb., 1874), *Eulimnogammarus verrucosus* (Gerstf., 1858) and *Eulimnogammarus vittatus* (Dyb., 1874), endemic to Lake Baikal, and *Gammarus lacustris* (Sars, 1863) common in surface waters across the Holarctic. *Eulimnogammarus cyaneus* is most abundant along the shallow shoreline (mainly up to 1 m water depth), few individuals occur at water depths up to 20 m [28] at temperatures between 5-13°C [22]. Habitats of *E. vittatus* are at water depths of up to 30 m, the abundance peak is at 2–3 m depth [29]; the water temperatures in the habitat range between 9-13°C [22]. *Eulimnogammarus verrucosus* commonly occurs close to shore across Lake Baikal at water depths of less than 1 m to up to 10–15 m [29] at temperatures of 5-13°C [22]. *Gammarus lacustris* is common in shallow, eutrophic lakes with seasonal temperature fluctuations in the Lake Baikal region at water depths of 0-7m but the species is not found in the open Baikal [30]. Constitutive transcript/protein levels of heat shock protein 70 (*hsp70*/Hsp70) and transcript levels of ATP binding cassette (ABC) transporter 1 (*abcb1*) indicate the cellular stress response capacities of the species in the order: *Eulimnogammarus vittatus*  $\approx$  *Eulimnogammarus verrucosus* < < *Eulimnogammarus cyaneus* < *Gammarus lacustris*. Indeed, the species-specific constitutive/induced *hsp70*/Hsp70 levels correlate with higher degrees of thermotolerance of *E. cyaneus* and *G. lacustris* compared to *E. verrucosus* [24-26, 31].

*Eulimnogammarus* specimens for the experiments were sampled at the Baikal shoreline close to Irkutsk State University's biological station at the Bolshie Koty settlement (Southern Baikal) and *G. lacustris* was collected from a small shallow artificial lake close to Bolshie Koty ("Lake 14", for specifications of the sampling points refer to [25]). Body lengths and

## *Stress gene responses in amphipods to cadmium*

weights of the animals used in the experiments were: *E. verrucosus* – 20-25 mm,  $403 \pm 95$  mg; *E. vittatus* – 18-20 mm,  $121 \pm 16$  mg; *E. cyaneus* – 9-14 mm,  $17 \pm 3$  mg; *G. lacustris* – 14-18 mm,  $80 \pm 16$  mg. Upon sampling the animals were brought to the lab in a cold box with water from the sampling sites. Animals were acclimated to lab conditions in aerated water in 2 L tanks at 6.5-7°C for 1-3 days prior to the experiments. The water used for maintaining the animals in the tanks and for the experiments was withdrawn from Lake Baikal with buckets from the pier next to the Biological Station in Bolshie Koty. Lake Baikal water instead of water from the pond where *G. lacustris* was collected was also used for *G. lacustris* exposures to avoid that differences in water contents (minerals, organic matter) affected the toxic effects of cadmium.

### *3.2. Acute toxicities of CdCl<sub>2</sub>*

Acute toxicity of CdCl<sub>2</sub> to amphipods was determined in 24 hr exposure experiments. Aqueous CdCl<sub>2</sub> solutions for the experiments were set up in glass tanks with 2 L of well-aerated water along a control with clean water. The water temperature in the tanks was maintained at 6.5-7.0°C during the exposures. Twenty amphipods of each species were placed in separate tanks with eight different CdCl<sub>2</sub> concentrations and a control. The CdCl<sub>2</sub> concentration ranges were 0.5 – 8 mg/L for *G. lacustris* and *E. cyaneus* and 0.625-30 mg/L for *E. verrucosus* and *E. vittatus*. During the experiments, tanks were regularly checked for dead animals that were removed and recorded. After 24 hrs alive and dead animals in all tanks were counted. Exposure experiments were repeated two to three times with different CdCl<sub>2</sub> concentrations that were chosen depending on the mortality rates determined for the already tested concentrations. Cadmium concentrations in water from a control and a CdCl<sub>2</sub> exposure were determined with atomic absorption spectroscopy (AAS) at the Analytical Chemistry

## *Stress gene responses in amphipods to cadmium*

Department at the UFZ. The actual deviated from the nominal Cd concentration by 15 % (nominal: 10 CdCl<sub>2</sub> mg/L; actual: 8.5 CdCl<sub>2</sub> mg/L) and all nominal CdCl<sub>2</sub> concentration values were adapted accordingly.

### *3.3. Measurements of conjugated diene (CD) levels*

Levels of conjugated dienes (CD) were measured in amphipods upon exposure to 5 mg/L CdCl<sub>2</sub> for 1, 6 and 24 hrs according to [32] with some modifications. Several entire animals were pooled to weights of 150 to 800 mg depending on the species and homogenized in a heptane/isopropyl alcohol mixture (1:1, v/v) using a Potter-Elvehjem tissue homogenizer, the extract was then filled in a glass tube and brought up to a volume of 4.5 ml with a heptane/isopropyl alcohol mixture. One ml of distilled water was added, the mix was vigorously shaken and incubated at 25°C for 30 min for phase separation. 0.5 ml of the heptane phase were mixed with ethanol in a 1:3 ratio (v/v) and the absorbance at 233 nm was measured on a SmartSpec Plus spectrophotometer (Bio-Rad) with extraction blanks used as references. An extinction coefficient of  $2.52 \times 10^4 \text{ M}^{-1} \text{ cm}^{-1}$  [33] was used to determine the amount of CD present. The data are reported as nmol g<sup>-1</sup> wet weight.

### *3.4. CdCl<sub>2</sub> exposures for investigating cellular stress responses*

Two sets of exposure experiments were performed for examining cellular responses of the different amphipod species to CdCl<sub>2</sub> exposure: 1) CdCl<sub>2</sub> exposure concentrations were scaled to species-specific LC10 and LC50 values enabling to compare responses at equal stress levels. Respective CdCl<sub>2</sub> exposure concentrations (LC10/LC50) were: *E. cyaneus* – 0.68/2.89 mg/L, *E. verrucosus* – 0.54/5.75 mg/L, *G. lacustris* – 0.59/1.7 mg/L; *E. vittatus* was only exposed to 5 mg/L corresponding to LC10. 2) Exposures were with all species at 1.7 (corresponding to the LC50 for *G. lacustris*) and 5.0 mg/L CdCl<sub>2</sub> (corresponding to the LC90

# *Stress gene responses in amphipods to cadmium*

for *G. lacustris*) enabling to determine species-specific responses to equal concentrations. CdCl<sub>2</sub> exposures were performed in aerated 2 L tanks (n=5/concentration) with Baikal water at 7°C. Specimens were sampled after 1, 6, and 24 hr exposures, frozen and stored in liquid nitrogen for extraction of total protein and diene conjugates or placed in QIAzol Lysis Reagent (Qiagen, Hilden, Germany) and frozen in liquid nitrogen for RNA isolation. Control animals were kept in CdCl<sub>2</sub> uncontaminated water but otherwise at equal temperature and aeration conditions as CdCl<sub>2</sub> exposed animals. One whole specimen of *E. verrucosus* or a pool of several whole animals of the other species equalling 200 to 500 mg of tissue were used for the further analyses. All exposure experiments were repeated at least five times and all samples were assessed in triplicate.

## *3.5. Isolation of total RNA and cDNA synthesis*

Isolation of total RNA and cDNA synthesis were performed as described in [27]. Tissue preserved in QIAzol Lysis Reagent was homogenized with a MM400 homogenizer (Retsch, Haan, Germany) followed by a phenol-guanidine-chloroform based extraction of total RNA. To improve the separation of the organic and aqueous phases MaXtract gel (Qiagen) was used according to the manufacturer. Total RNA was purified from the obtained aqueous phase with the miRNeasy kit with DNase treatment using a QIAcube instrument (Qiagen). One µg of total RNA was reverse-transcribed to single-stranded cDNA using Oligo(dT)18 primer (Fermentas, USA, #SO131) and H Minus Reverse Transcriptase system (Fermentas, USA, #EP0452) following the manufacturer's instructions.

## *3.6. Quantitative real-time PCR analysis*

Gene expression levels were analysed with quantitative polymerase chain reaction (qPCR) using a StepOnePlus Real-Time PCR System (Applied Biosystems) as described



## *Stress gene responses in amphipods to cadmium*

previously [25]. The amplification was performed in a final volume of 12.5 µl using the SensiMix SYBR Low-ROX Kit (Bioline) with each primer at 200 nM. Primer sequences for qPCR of *hsp70* and *abcb1* and housekeeping genes  $\beta$ -actin, *gapdh* and *efl-a* were from [25]; qPCR conditions were according to [25, 27]: 94 °C for 4 min; 35 (for *hsp70* and references genes) and 45 cycles (for *abcb1*) with 95 °C for 15 sec, 60-62 °C for 15 sec and 72 °C for 15 sec followed to fluorescent measurement step with 78-79°C (close to the melting temperature of the PCR products) for 10 sec. The extra step for fluorescence measurement was added to avoid detection of unspecific amplification products and primer dimers. Relative expression levels of *hsp70* and *abcb1* genes were calculated with the comparative  $\Delta\Delta C_t$  method [34] using efficiency corrected calculation models and Best Keeper levels based on the geometric mean of the  $C_t$  values of the housekeeping genes [35-37].

### *3.7. Western-blotting*

Isolation of total protein from amphipod tissue and Western-blotting were performed as described in [25]. Tissues were homogenized in 0.1 M Tris buffer (pH=7.6) containing 1.5 mg phenylmethylsulfonyl fluoride (PMSF) and 1% protease inhibitor cocktail (Amresco, USA); proteins were then subjected to denaturation in Tris-HCl buffer (0.25 M Tris-HCl (pH = 6.8), 5% sodium dodecyl sulphate (SDS), 0.5 mM ethylenediamine tetraacetic acid (EDTA), 10% glycerol, 5%  $\beta$ -mercaptoethanol and 0.03% Bromophenol Blue) at 95 °C for 5 min. Total protein concentrations were determined following [38]. Equal amounts of total protein per sample were separated by SDS gel electrophoresis on a 12.5% polyacrylamide gel [39] using a Mini-PROTEAN II Electrophoretic Cell (Bio-Rad, USA). Wet-transfer of the proteins from the gel to a polyvinylidene difluoride transfer membrane (GE Healthcare, UK) was according to [40] with minor modifications. Hsp70 protein was labelled with anti-HSP70

# *Stress gene responses in amphipods to cadmium*

(Sigma-Aldrich, # H9776) at 1:3000, which detects both the inducible and constitutive forms of HSP70, and with secondary antibodies conjugated with alkaline phosphatase (Anti-Mouse IgG:AP Conj., Stressgen # SAB-101) at 1:1000. Anti-actin antibody (Sigma-Aldrich, # A2668) dissolved 1:400 and secondary antibodies (Anti-Rabbit IgG, Sigma, # A9919) dissolved 1:1000 were used for actin labelling. Sixty ng of bovine Hsp70 (Sigma-Aldrich, # H9776) and 60 ng of bovine actin (Sigma-Aldrich, A3653) were used as positive controls. Bands were visualized with 0.4 mM BCIP (5-bromo-4-chloro-3-indolyl phosphate) and 0.4 mM NBT (nitroblue tetrazolium). The Gel Explorer software package (DNAtechnology, Russia) was used for semi-quantitative measurements of Hsp70 and actin levels on the membranes and Hsp70 levels were normalized relative to actin for each sample.

## *3.8. Data analysis and statistics*

Regressions of concentration-mortality relationships were calculated by fitting mortalities at the respective concentrations to the non-linear HILL model:

$$Y(c_{CdCl_2}) = \min + \frac{(\max - \min)}{1 + 10^{(LogLC50 - X) * P}} \quad (\text{eq.1})$$

where

**Y** is the mortality at the CdCl<sub>2</sub> concentration *c*

**X** is the logarithm of the CdCl<sub>2</sub> concentration

**min** is the minimum percentage mortality (control, constrained to 0)

**max** is the maximal percentage mortality (constrained to 100)

**P** is the shape parameter

**LC50** is the constant describing the CdCl<sub>2</sub> concentration causing 50% mortality

# *Stress gene responses in amphipods to cadmium*

Regressions of *hsp70* transcript/Hsp70 protein levels at respective CdCl<sub>2</sub> concentrations expressed as LCx values were calculated by fitting the observations at the respective concentrations to the Gaussian distribution model:

$$Y_{(LCx)} = ampl * \exp \left( -0.5 * \left( \frac{X - mean}{SD} \right)^2 \right) \text{ (eq. 2)}$$

where

**Y** is the gene expression level at LCx (lethal concentration for x% of individuals)

**X** is LCx

**ampl** (amplitude) is the height of the center of the distribution in Y units

**SD** is a measure of the width of the distribution (in LCx)

Data for qPCR, Western-blot and lipid peroxidation analyses were found to satisfy the assumptions of equal variance and normality and parametric statistics were used. For pairwise comparisons of *abcb1* and *hsp70*/Hsp70 levels in treatments and respective controls at each time point the t-test was applied. Multiple comparisons of several treatments with one respective control were done with two-way ANOVA and Dunnett's test. To analyse the significance of observed changes in each time-point, pair-wise comparisons with the respective control were done. The results of multiple pair-wise comparisons were done using Steel-Dwass method for all pairs' comparison. Differences were regarded as significant if  $P < 0.05$ . Regressions were calculated with Graphpad Prism version 7. Statistical analyses were performed with JMP version 10.0 (SAS Institute, Cary, NC).

# *Stress gene responses in amphipods to cadmium*

## **Results**

### *4.1. Lethal CdCl<sub>2</sub> concentrations*

Acutely toxic CdCl<sub>2</sub> concentrations were across the different amphipod species from < 1 to < 100 mg/L (Fig. 1, Table 1). The range of LCx values calculated from CdCl<sub>2</sub> concentration – lethality relationships were over an order of magnitude across the species. LCx values were highest for *E. vittatus* indicating the lowest sensitivity of this species to CdCl<sub>2</sub>. The order of the species with regard to their sensitivities to CdCl<sub>2</sub> was: *G. lacustris* < *E. cyaneus* < *E. verrucosus* < *E. vittatus* (Fig. 1, Table 1).

### *4.2. Conjugated diene (CD) levels*

After 1 and 6 hr exposures to 5 mg/L CdCl<sub>2</sub> no significant changes in CD levels were seen in any of the examined species. Significant increases of CD levels by about 58% and 47% occurred only in *E. cyaneus* and *G. lacustris*, respectively, after 24 hr exposures (Fig. 2). The CdCl<sub>2</sub> concentration of 5 mg/L corresponds to LC70 and LC90 for *E. cyaneus* and *G. lacustris*, respectively. For *E. vittatus* and *E. verrucosus* this CdCl<sub>2</sub> concentration is equivalent to LC10 and LC45, respectively (Fig. 1, Table 1).

### *4.3. Heat shock protein 70 transcript/protein levels*

*Hsp70* transcript levels across the amphipod species were upon exposures to CdCl<sub>2</sub> significantly ( $p < 0.05$ ) increased by between 1.4 - (*E. cyaneus* at LC30 for 24 hrs) to up to 9.1-fold (*E. cyaneus* at LC70 for 24 hrs) (Fig. 3a, b). With longer exposure times to CdCl<sub>2</sub> changes in *hsp70* transcript levels were in all amphipod species generally more pronounced: After 1 hr exposures *hsp70* levels were significantly ( $p < 0.05$ ) increased in two cases (*E.*

# *Stress gene responses in amphipods to cadmium*

*cyaneus* at LC30, *G. lacustris* at LC90), after 6 hr exposures in four cases (*E. cyaneus* at LC30, *E. verrucosus* and *G. lacustris* at LC50, *G. lacustris* at LC90) and after 24 hr exposures in nine cases (*E. vittatus* at LC10, *G. lacustris* at LC10, LC50 and LC90, *E. verrucosus* at LC25, LC45 and LC50, *E. cyaneus* at LC30 and LC70; Fig. 3a). Although significant changes in *hsp70* transcript levels were also seen with CdCl<sub>2</sub> at lower LCx, changes were more pronounced at higher LCx levels and could be described with a regression curve over all data following a Gaussian shape with an overall maximum *hsp70* transcript level at LC70 followed by a decrease (Fig. 3b).

Hsp70 protein levels across amphipod species from CdCl<sub>2</sub> treatments also followed a Gaussian function when expression data were related to the respective LCx values (Fig. 4). Significantly ( $p < 0.05$ ) increased Hsp70 protein levels were seen in *E. cyaneus* at 1.8- and 1.7-fold, respectively, after 1 and 6 hr exposures to 5 mg/l CdCl<sub>2</sub> corresponding to the species-specific LC70; and in *E. verrucosus* after 24 hrs exposure with a 2.6-fold increased protein level above the control. For this species 5 mg/l CdCl<sub>2</sub> corresponded to the LC45. In *E. vittatus* and *G. lacustris* exposed to the species-specific LC10 and LC90, respectively, Hsp70 protein levels were not significantly different from the respective controls (Fig. 4).

## *4.4. Abcb1 transcript levels*

Upon exposures of amphipods to CdCl<sub>2</sub> *abcb1* transcript levels were significantly ( $p < 0.05$ ) increased by between 2.2- (*E. cyaneus* at LC50 for 24 hrs) to up to 4.7-fold (*E. verrucosus* at LC45 for 24 hrs). Over the different exposure times the number of cases of *abcb1* increases only slightly changed. Thus, *abcb1* transcript levels were increased in three cases at 1 hr exposures (*E. verrucosus* at LC25, *E. cyaneus* at LC70, *G. lacustris* at LC90), in two cases at 6 hr exposures (*E. cyaneus* at LC50, *G. lacustris* at LC90) and in four cases at 24

# *Stress gene responses in amphipods to cadmium*

hr exposures (*E. verrucosus* at LC45, *E. cyaneus* at LC50, *G. lacustris* at LC90, *E. vittatus* at LC10). Significant *abcb1* transcript increases at all three time points occurred only in *G. lacustris* at LC90; in *E. cyaneus* at LC50 *abcb1* transcripts were increased at two time points. In the other cases, significant *abcb1* transcript increases were seen only at one time point. Changes in *abcb1* transcript levels did not seem to depend on CdCl<sub>2</sub> concentration / LCx value; the significant changes were seen across different LCx values and were not generally induced at higher or lower LCx values (Fig. 5).

## **Discussion**

The four examined amphipod species showed clear differences regarding toxic sensitivities to CdCl<sub>2</sub> that became evident by LC50 values ranging over one order of magnitude (Table 1). Along those lines the levels of conjugated dienes, indicating cadmium effects on the molecular level, were at equal CdCl<sub>2</sub> exposure concentrations only increased in the toxicologically more sensitive species *E. cyaneus* and *G. lacustris* (Fig. 2). Conjugated dienes are primary products of lipid peroxidation resulting from oxidative stress [41, 42], a main cause of the toxic action of cadmium [43, 44]. This effect of CdCl<sub>2</sub> on gammarids was indicated in a previous study where it was found that CdCl<sub>2</sub> exposure leads to the inhibition of common antioxidant enzymes in gammarids [45]. Differences in internal cadmium levels as a consequence of different cadmium uptake rates can, to a certain extent, be seen as a reason for the differences in toxicological sensitivities of the different species. Body size has previously been shown to be an important determinant of cadmium uptake by aquatic insects [46]. Along those lines, cadmium uptake rates during CdCl<sub>2</sub> exposures were higher in the concurrently toxicologically more sensitive *E. cyaneus* than in *E. verrucosus* that differed by 10- to 50-fold

# *Stress gene responses in amphipods to cadmium*

in freshwater [47]. In the present study, *G. lacustris* individuals that were similar in size to *E. cyaneus* individuals showed toxic sensitivities that were accordingly in the same range as for *E. cyaneus* (Table 1). *Eulimnogammarus vittatus*, however, was from the examined species least sensitive to CdCl<sub>2</sub> although the body sizes of the individuals were clearly below those of *E. verrucosus* and it can be assumed that the cadmium uptake rate was accordingly higher. It was previously found that the occurrence of toxic effects by CdCl<sub>2</sub> in *E. verrucosus* was in addition to a in comparison to *E. cyaneus* lower cadmium uptake rate further depressed by a reaction to CdCl<sub>2</sub> exposure with metabolic depression [47]. This was not examined here but it seems conceivable that the in comparison low toxic sensitivity of *E. vittatus* to CdCl<sub>2</sub> may be due to particularly pronounced metabolic depression as a reaction to CdCl<sub>2</sub> exposure.

Although metabolic depression by cadmium may have decreased activity on a physiological level it appeared to have no effect on the transcription activity. Thus, *hsp70* was significantly induced in *E. verrucosus* that previously showed a metabolic depression response to CdCl<sub>2</sub> exposure but not in *E. cyaneus* that does not respond to CdCl<sub>2</sub> with metabolic depression [47] in the 6 and 24 hr CdCl<sub>2</sub> treatments at LC50 (Fig. 3). Furthermore, a significant *abcb1* increase was seen in *E. verrucosus* at LC25 but not in *E. cyaneus* at LC30 after 1 hr exposure to CdCl<sub>2</sub> and in *E. vittatus* but no other species at LC10 after 24 hrs exposure to CdCl<sub>2</sub> (Fig 5).

The CdCl<sub>2</sub>-dependent *hsp70* transcript and Hsp70 protein response levels could across the species be related to the respective CdCl<sub>2</sub> –related stress levels. When plotting all *hsp70* transcript or Hsp70 protein levels across species against the respective species-specific LCx values the values showed an increase to a maximum followed by a decrease at higher LCx values (Figs. 3, 4). When assuming that the increasing LCx values represent increasing

# *Stress gene responses in amphipods to cadmium*

degrees of stress this course represents stress-level dependent expression degrees that for Hsp70 has been described before: The Hsp70 titre increase in the “compensation phase” is followed by a Hsp70 titre decrease in the “non-compensation phase” at higher toxicity levels when the ability of the cells to react to the toxicant is increasingly degraded [48]. The applied CdCl<sub>2</sub> concentration represented different degrees of stress for the different amphipod species; at this stage it is assumed but it cannot be definitely asserted that the *hsp70* transcript/Hsp70 protein responses are equal in the different amphipod species at corresponding stress levels.

Provided that across the gammarid species equal internal, toxicologically relevant cadmium concentrations cause equal levels of toxic effects, as was indicated earlier [47], the LCx values can be regarded as approximate measures of the respective internal cadmium concentrations. Hence, across the species the degrees of *hsp70* transcript and Hsp70 protein induction appear to be approximately equal at corresponding internal cadmium levels.

Induction of *abcb1* transcripts tends to depend on LCx levels and time of exposure, i.e., internal cadmium levels. Increased *abcb1* levels were more seen at higher CdCl<sub>2</sub> LCx values and occurred at lower LCx levels after longer times of exposure (Fig. 5). However, across species *abcb1* induction levels are not uniform at equal LCx levels. Thus, after 24 hrs exposure to CdCl<sub>2</sub> at LC10 *abcb1* levels were only significantly increased in *E. vittatus* but not in *E. verrucosus*, *E. cyaneus* and *G. lacustris*; after 6 and 24 hrs exposure to CdCl<sub>2</sub> at LC50 significant *abcb1* increases were only seen in *E. cyaneus* but not in *E. verrucosus* and *G. lacustris* (Fig. 5).

The differences in sensitivity of the *hsp70* and *abcb1* transcript responses among the gammarid species may confirm that induction of the two genes is *via* different pathways.



## *Stress gene responses in amphipods to cadmium*

Misfolded proteins that are damaged e.g. by the impact of cadmium-induced ROS [15, 16] trigger the induction of the *hsp70* gene as, according to the chaperone titration model [49], heat shock factor (Hsf1) is released when Hsps bind to the misfolded proteins thus initiating *hsp* transcription. Induction of *abcb1* appears to be triggered *via* another pathway involving the transcription factor NF- $\kappa$ B [15, 16].

Both Hsp70 and Abcb1 proteins act as protective proteins against cadmium toxicity: Hsp70 as chaperone preserves the structure of intact proteins and re-folds damaged proteins; Abcb1, a cellular efflux transporter, appears to efflux cell membrane components, such as ceramides, that result from membrane damage by ROS and can induce apoptosis [15, 16]. It was found earlier that *E. cyaneus* that shows higher constitutive and induced levels of Hsp70 than *E. verrucosus* [24, 25] detoxifies a higher proportion of cadmium by binding it to proteins of the biologically detoxified heat stable protein fraction (BDF) [47]. The in comparison high constitutive Hsp70 titres in *Gammarus lacustris* [25] may indicate that also in this species a comparatively high level of the internal cadmium is bound to the BDF. However, when considering that the toxicologically more sensitive gammarid species have higher titers of cadmium detoxifying proteins and that the transcripts of both here examined proteins are induced by cadmium only at comparatively high stress levels, it seems obvious that overall the detoxifying effect by those cellular stress response proteins on cadmium is only minor. Major determinants of the cadmium sensitivity of the species appear to be body size and in relation to that the cadmium uptake rate and one additional parameter that could be the degree of metabolic depression caused by cadmium.

## **Summary and Conclusions**

# *Stress gene responses in amphipods to cadmium*

In this study cadmium induced *hsp70*/Hsp70 and *abcb1* levels in gammarids exposed to CdCl<sub>2</sub> were for the first time phenotypically anchored, i.e., exposure concentrations of treatments for transcript measurements were equated with the respective lethal concentrations (LCx). When gene/protein responses were related to LCx values the four gammarid species examined showed a relatively uniform *hsp70*/Hsp70 response with pronounced responses in CdCl<sub>2</sub> treatments at higher LCx and in lower LCx treatments after longer times of exposure to CdCl<sub>2</sub> (Figs. 3, 4). For *abcb1*, responses to CdCl<sub>2</sub> exposure when related to LCx levels were not uniform across the species; however, *abcb1* was overall also induced by CdCl<sub>2</sub> in the lethal concentration range (Fig. 5). Induction of *hsp70*/Hsp70 and *abcb1* responses by CdCl<sub>2</sub> in the lethal concentration range in the gammarids indicates that changes in transcript levels of those genes are rather insensitive markers for cadmium stress.

## **Acknowledgements**

We would like to thank Rolf Altenburger, Andreas Schüttler, Daria Bedulina and Maxim Timofeyev for their input and discussions related to the study; Sibylle Mothes for Cd analyses of water samples; and Stephan Schreiber for his help with the QIAcube at the Fraunhofer Institute for Cell Therapy and Immunology IZI, Leipzig. This study was financially supported by scholarships from the Deutscher Akademischer Austauschdienst (DAAD) and the Russian Ministry of Education and Science (“Mikhail Lomonosov” Programme) (M.P., V.P.), by an international DAAD scholarship (M.P., V.P.), by an Erasmus Mundus (MULTIC II) scholarship (V.P.), the project of Goszadaniye of Siberian Institute of Plant Physiology and Biochemistry (No 0343-2017-0006; M.P., V.P.) and by the bilateral funding programs “Helmholtz-Russia Joint Research Groups” (HRJRG) from the Helmholtz

# *Stress gene responses in amphipods to cadmium*

Association and the Russian Foundation for Basic Research (RFBR) (LaBeglo project HRJRG-221; M.P., V.P., TL) and „Helmholtz-RSF Joint Research Groups” from the Helmholtz Association and the Russian Science Foundation (RSF) (LaBeglo2/RSF 18-44-06201; T.L.). The funders had no role in study design, data collection and analysis, decision to publish, or preparation of the manuscript.

## **References**

1. Pinot F, Kreps SE, Bachelet M, Hainaut P, Bakonyi M, Polla BS. Cadmium in the environment: sources, mechanisms of biotoxicity, and biomarkers. *Rev Environ Health*. 2000;15(3):299-323. Epub 2000/10/26. PubMed PMID: 11048333.
2. Nemmiche S. Oxidative signaling response to cadmium exposure. *Toxicol Sci*. 2017;156(1):4-10. Epub 2016/11/03. doi: 10.1093/toxsci/kfw222. PubMed PMID: 27803385.
3. Kim BM, Rhee JS, Jeong CB, Seo JS, Park GS, Lee YM, et al. Heavy metals induce oxidative stress and trigger oxidative stress-mediated heat shock protein (hsp) modulation in the intertidal copepod *Tigriopus japonicus*. *Comp Biochem Physiol C Toxicol Pharmacol*. 2014;166:65-74. Epub 2014/07/25. doi: 10.1016/j.cbpc.2014.07.005. PubMed PMID: 25058597.
4. Haap T, Köhler HR. Cadmium tolerance in seven *Daphnia magna* clones is associated with reduced hsp70 baseline levels and induction. *Aquat Toxicol*. 2009;94(2):131-7. Epub 2009/07/17. doi: 10.1016/j.aquatox.2009.06.006. PubMed PMID: 19604586.
5. Blechinger SR, Warren JT, Jr., Kuwada JY, Krone PH. Developmental toxicology of cadmium in living embryos of a stable transgenic zebrafish line. *Environ Health Perspect*. 2002;110(10):1041-6. Epub 2002/10/04. doi: 10.1289/ehp.021101041. PubMed PMID: 12361930; PubMed Central PMCID: PMC1241031.
6. Schill RO, Görlitz H, Köhler HR. Laboratory simulation of a mining accident: acute toxicity, hsc/hsp70 response, and recovery from stress in *Gammarus fossarum* (Crustacea,

# *Stress gene responses in amphipods to cadmium*

- Amphipoda) exposed to a pulse of cadmium. *Biometals*. 2003;16(3):391-401. Epub 2003/04/12. PubMed PMID: 12680701.
7. da Silva Cantinha R, Borrelly SI, Oguiura N, de Braganca Pereira CA, Rigolon MM, Nakano E. HSP70 expression in *Biomphalaria glabrata* snails exposed to cadmium. *Ecotoxicol Environ Saf*. 2017;140:18-23. Epub 2017/02/24. doi: 10.1016/j.ecoenv.2017.02.026. PubMed PMID: 28231501.
8. Eufemia NA, Epel D. Induction of the multixenobiotic defense mechanism (MXR), P-glycoprotein, in the mussel *Mytilus californianus* as a general cellular response to environmental stresses. *Aquat Toxicol*. 2000;49(1-2):89-100. Epub 2000/05/18. PubMed PMID: 10814809.
9. Werner I, Nagel R. Stress proteins HSP60 and HSP70 in three species of amphipods exposed to cadmium, diazinon, dieldrin and fluoranthene. *Environ Toxicol Chem*. 1997;16(11):2393-403.
10. Lee SM, Lee SB, Park CH, Choi J. Expression of heat shock protein and hemoglobin genes in *Chironomus tentans* (Diptera, chironomidae) larvae exposed to various environmental pollutants: a potential biomarker of freshwater monitoring. *Chemosphere*. 2006;65(6):1074-81. Epub 2006/04/21. doi: 10.1016/j.chemosphere.2006.02.042. PubMed PMID: 16624371.
11. Piano A, Valbonesi P, Fabbri E. Expression of cytoprotective proteins, heat shock protein 70 and metallothioneins, in tissues of *Ostrea edulis* exposed to heat and heavy metals. *Cell Stress Chaperones*. 2004;9(2):134-42. Epub 2004/10/23. PubMed PMID: 15497500; PubMed Central PMCID: PMC1065293.
12. Singer C, Zimmermann S, Sures B. Induction of heat shock proteins (hsp70) in the zebra mussel (*Dreissena polymorpha*) following exposure to platinum group metals (platinum, palladium and rhodium): comparison with lead and cadmium exposures. *Aquat Toxicol*. 2005;75(1):65-75. Epub 2005/08/23. doi: 10.1016/j.aquatox.2005.07.004. PubMed PMID: 16111776.
13. Ivanina AV, Sokolova IM. Effects of cadmium exposure on expression and activity of P-glycoprotein in eastern oysters, *Crassostrea virginica* Gmelin. *Aquat Toxicol*.

# *Stress gene responses in amphipods to cadmium*

- 2008;88(1):19-28. Epub 2008/05/03. doi: 10.1016/j.aquatox.2008.02.014. PubMed PMID: 18453012.
14. Zucchi S, Corsi I, Luckenbach T, Bard SM, Regoli F, Focardi S. Identification of five partial ABC genes in the liver of the Antarctic fish *Trematomus bernacchii* and sensitivity of ABCB1 and ABCC2 to Cd exposure. *Environ Pollut.* 2010;158(8):2746-56. Epub 2010/07/16. doi: 10.1016/j.envpol.2010.04.012. PubMed PMID: 20627496.
15. Beyersmann D, Hechtenberg S. Cadmium, gene regulation, and cellular signalling in mammalian cells. *Toxicol Appl Pharmacol.* 1997;144(2):247-61. Epub 1997/06/01. doi: 10.1006/taap.1997.8125. PubMed PMID: 9194408.
16. Thévenod F, Friedmann JM, Katsen AD, Hauser IA. Up-regulation of multidrug resistance P-glycoprotein via nuclear factor-kappaB activation protects kidney proximal tubule cells from cadmium- and reactive oxygen species-induced apoptosis. *J Biol Chem.* 2000;275(3):1887-96. Epub 2000/01/15. PubMed PMID: 10636889.
17. Timoshkin OA. Index of animal species inhabiting Lake Baikal and its catchment area. Novosibirsk: Nauka; 2001. 832 p.
18. Kozhova OM, Izmet'seva LRe. Lake Baikal - Evolution and Biodiversity. Leiden: Backhuys Publishers; 1998. 447 p.
19. Ciesielski TM, Pastukhov MV, Leeves SA, Farkas J, Lierhagen S, Poletaeva VI, et al. Differential bioaccumulation of potentially toxic elements in benthic and pelagic food chains in Lake Baikal. *Environ Sci Pollut Res Int.* 2016;23(15):15593-604. Epub 2016/05/01. doi: 10.1007/s11356-016-6634-0. PubMed PMID: 27130338.
20. Kulikova NN, Mekhanikova IV, Chebykin EP, Vodneva EV, Timoshkin OA, Suturin AN. Chemical element composition and amphipod concentration function in Baikal littoral zone. *Water Resour.* 2017;44(3):497-511. doi: 10.1134/S0097807817030125. PubMed PMID: WOS:000405126000014.
21. Bedulina DS, Takhteev VV, Pogrebnnyak SG, Govorukhina EB, Madyarova EV, Lubyaga YA, et al. On *Eulimnogammarus messerschmidtii*, sp. n. (Amphipoda: Gammaridea) from Lake Baikal, Siberia, with redescription of *E. cyanoides* (Sowinsky) and remarks on

# *Stress gene responses in amphipods to cadmium*

- 484 taxonomy of the genus *Eulimnogammarus*. Zootaxa. 2014;3838(5):518-44. Epub 2014/08/02.  
485 doi: 10.11646/zootaxa.3838.5.2. PubMed PMID: 25081795.
- 486 22. Takhteev VV. Essays on the amphipods of Lake Baikal: systematics, comparative  
487 ecology, evolution. Irkutsk, Russia [in Russian]: Irkutsk State University Press; 2000.
- 488 23. Luckenbach T, Bedulina D, Timofeyev M. Is the endemic fauna of Lake Baikal  
489 affected by global change? In: Kappas M, Karthe D, Chalov S, Kasimov N, editors. Water  
490 and Environment in the Selenga- Baikal Basin: International Research Cooperation for an  
491 Ecoregion of Global Relevance. 23. Stuttgart, Germany: ibidem-Verlag/ibidem Press; 2015.  
492 p. 219-35.
- 493 24. Bedulina DS, Evgen'ev MB, Timofeyev MA, Protopopova MV, Garbuz DG,  
494 Pavlichenko VV, et al. Expression patterns and organization of the hsp70 genes correlate with  
495 thermotolerance in two congener endemic amphipod species (*Eulimnogammarus cyaneus* and  
496 *E. verrucosus*) from Lake Baikal. Mol Ecol. 2013;22(5):1416-30. Epub 2013/01/22. doi:  
497 10.1111/mec.12136. PubMed PMID: 23331571.
- 498 25. Protopopova MV, Pavlichenko VV, Menzel R, Putschew A, Luckenbach T, Steinberg  
499 CE. Contrasting cellular stress responses of Baikalian and Palearctic amphipods upon  
500 exposure to humic substances: environmental implications. Environ Sci Pollut Res Int.  
501 2014;21(24):14124-37. Epub 2014/07/24. doi: 10.1007/s11356-014-3323-8. PubMed PMID:  
502 25053285.
- 503 26. Axenov-Gribanov D, Bedulina D, Shatilina Z, Jakob L, Vereshchagina K, Lubyaga Y,  
504 et al. Thermal Preference Ranges Correlate with Stable Signals of Universal Stress Markers in  
505 Lake Baikal Endemic and Holarctic Amphipods. PLoS One. 2016;11(10):e0164226. Epub  
506 2016/10/06. doi: 10.1371/journal.pone.0164226. PubMed PMID: 27706227; PubMed Central  
507 PMCID: PMCPMC5051968.
- 508 27. Pavlichenko VV, Protopopova MV, Timofeyev M, Luckenbach T. Identification of a  
509 putatively multixenobiotic resistance related Abcb1 transporter in amphipod species endemic  
510 to the highly pristine Lake Baikal. Environ Sci Pollut Res Int. 2015;22(7):5453-68. Epub  
511 2014/11/05. doi: 10.1007/s11356-014-3758-y. PubMed PMID: 25367643.
- 512 28. Weinberg IV, Kamaltynov RM. Macrozoobenthic communities of rocky beach of  
513 Lake Baikal. 1. Fauna Zoologicheskii Zhurnal. 1998;77:259- 65 [In Russian].

# *Stress gene responses in amphipods to cadmium*

- 514 29. Bazikalova A. Amphipods of Baikal. Moscow: [Department of Commerce of the USA  
515 translation of the original]; 1945.
- 516 30. Bekman MY. Biologiya *Gammarus lacustris* Sars v pribaiikal'skikh ozerakh [Biology  
517 of *Gammarus lacustris* Sars from water bodies near Lake Baikal]. Trudy Baikal'skoy  
518 limnologicheskoi Stancii [Proceedings of the Baikal Limnological Station]. 1954;14:268-311  
519 [in Russian].
- 520 31. Jakob L, Axenov-Gribanov DV, Gurkov AN, Ginzburg M, Bedulina DS, Timofeyev  
521 MA, et al. Lake Baikal amphipods under climate change: thermal constraints and ecological  
522 consequences. Ecosphere. 2016;7(3). doi: ARTN e01308  
523 10.1002/ecs2.1308. PubMed PMID: WOS:000374896800038.
- 524 32. Stalnaya ID. The method for determining diene conjugation of unsaturated fatty acids.  
525 In: Orekhovich VN, editor. The modern methods in biochemistry. Moscow, Russia: Izdatelstvo  
526 Meditsina; 1977. p. 63-4 [in Russian].
- 527 33. Low PA, Nickander KK. Oxygen free radical effects in sciatic nerve in experimental  
528 diabetes. Diabetes. 1991;40(7):873-7. Epub 1991/07/01. PubMed PMID: 2060723.
- 529 34. Livak KJ, Schmittgen TD. Analysis of relative gene expression data using real-time  
530 quantitative PCR and the 2(T)(-Delta Delta C) method. Methods. 2001;25(4):402-8. doi:  
531 10.1006/meth.2001.1262. PubMed PMID: WOS:000173949500003.
- 532 35. Pfaffl MW, Tichopad A, Prgomet C, Neuvians TP. Determination of stable  
533 housekeeping genes, differentially regulated target genes and sample integrity: BestKeeper -  
534 Excel-based tool using pair-wise correlations. Biotechnol Lett. 2004;26(6):509-15. doi: Doi  
535 10.1023/B:Bile.0000019559.84305.47. PubMed PMID: WOS:000220217900008.
- 536 36. Vandesompele J, De Preter K, Pattyn F, Poppe B, Van Roy N, De Paepe A, et al.  
537 Accurate normalization of real-time quantitative RT-PCR data by geometric averaging of  
538 multiple internal control genes. Gen Biol. 2002;3(7). doi: ARTN 0034.1  
539 10.1186/gb-2002-3-7-research0034. PubMed PMID: WOS:000207581200010.
- 540 37. Pfaffl M. Relative quantification. In: Dorak T, editor. Real-time PCR: International  
541 University Line 2006. p. 63-82.



*Stress gene responses in amphipods to cadmium*

38. Lowry OH, Rosebrough NJ, Farr AL, Randall RJ. Protein measurement with the Folin phenol reagent. J Biol Chem. 1951;193(1):265-75. Epub 1951/11/01. PubMed PMID: 14907713.
39. Laemmli UK. Cleavage of structural proteins during the assembly of the head of bacteriophage T4. Nature. 1970;227(5259):680-5. Epub 1970/08/15. PubMed PMID: 5432063.
40. Towbin H, Staehelin T, Gordon J. Electrophoretic transfer of proteins from polyacrylamide gels to nitrocellulose sheets: procedure and some applications. Proc Natl Acad Sci U S A. 1979;76(9):4350-4. Epub 1979/09/01. PubMed PMID: 388439; PubMed Central PMCID: PMC411572.
41. Jozwik M, Wolczynski S, Jozwik M, Szamatowicz M. Oxidative stress markers in preovulatory follicular fluid in humans. Mol Hum Reprod. 1999;5(5):409-13. Epub 1999/05/25. PubMed PMID: 10338363.
42. Chang D, Sha Q, Zhang X, Liu P, Rong S, Han T, et al. The evaluation of the oxidative stress parameters in patients with primary angle-closure glaucoma. PLoS One. 2011;6(11):e27218. Epub 2011/11/19. doi: 10.1371/journal.pone.0027218. PubMed PMID: 22096540; PubMed Central PMCID: PMC3214032.
43. Dally H, Hartwig A. Induction and repair inhibition of oxidative DNA damage by nickel(II) and cadmium(II) in mammalian cells. Carcinogenesis. 1997;18(5):1021-6. Epub 1997/05/01. PubMed PMID: 9163690.
44. Stohs SJ, Bagchi D. Oxidative mechanisms in the toxicity of metal ions. Free Radic Biol Med. 1995;18(2):321-36. Epub 1995/02/01. PubMed PMID: 7744317.
45. Timofeyev MA, Shatilina ZM, Bedulina DS, Protopopova MV, Pavlichenko VV, Grabelnykh OI, et al. Evaluation of biochemical responses in Palearctic and Lake Baikal endemic amphipod species exposed to CdCl<sub>2</sub>. Ecotoxicol Environ Saf. 2008;70(1):99-105. Epub 2007/10/09. doi: 10.1016/j.ecoenv.2007.06.014. PubMed PMID: 17920682.
46. Buchwalter DB, Cain DJ, Martin CA, Xie L, Luoma SN, Garland T, Jr. Aquatic insect ecophysiological traits reveal phylogenetically based differences in dissolved cadmium susceptibility. Proc Natl Acad Sci U S A. 2008;105(24):8321-6. Epub 2008/06/19. doi:



# *Stress gene responses in amphipods to cadmium*

571 10.1073/pnas.0801686105. PubMed PMID: 18559853; PubMed Central PMCID:  
572 PMCPMC2448835.

573 47. Jakob L, Bedulina DS, Axenov-Gribanov DV, Ginzburg M, Shatilina ZM, Lubyaga  
574 YA, et al. Uptake kinetics and subcellular compartmentalization explain lethal but not  
575 sublethal effects of cadmium in two closely related amphipod species. Environ Sci Technol.  
576 2017;51(12):7208-18. Epub 2017/05/12. doi: 10.1021/acs.est.6b06613. PubMed PMID:  
577 28493692.

578 48. Eckwert H, Alberti G, Köhler HR. The induction of stress proteins (hsp) in *Oniscus*  
579 *asellus* (Isopoda) as a molecular marker of multiple heavy metal exposure: I. Principles and  
580 toxicological assessment. Ecotoxicology. 1997;6:249-62.

581 49. Richter K, Haslbeck M, Buchner J. The heat shock response: life on the verge of  
582 death. Mol Cell. 2010;40(2):253-66. Epub 2010/10/23. doi: 10.1016/j.molcel.2010.10.006.  
583 PubMed PMID: 20965420.

584

585

# *Stress gene responses in amphipods to cadmium*

## Tables

**Table 1.** Lethal concentration values (LCx; x: % lethality) for CdCl<sub>2</sub> (mg/L) and curve parameters for the different amphipod species determined with the HILL model (eq. 1, see Fig. 1). CI: confidence interval, R<sup>2</sup>: curve fit

|                |        | <i>E. vittatus</i> | <i>E. verrucosus</i> | <i>E. cyaneus</i> | <i>G. lacustris</i> |
|----------------|--------|--------------------|----------------------|-------------------|---------------------|
| LCx            | 10     | 4.47               | 0.54                 | 0.67              | 0.59                |
|                | 25     | 8.98               | 1.76                 | 1.38              | 1.01                |
|                | 30     | 10.63              | 2.31                 | 1.64              | 1.14                |
|                | 45     | 16.07              | 4.65                 | 2.52              | 1.55                |
|                | 50     | 18.05              | 5.72                 | 2.89              | 1.71                |
|                | 95% CI | 12.4-26.6          | 3.8-8.7              | 2.1-4.0           | 1.3-2.4             |
|                | 70     | 31.05              | 14.31                | 5.05              | 2.59                |
|                | 75     | 36.74              | 18.76                | 5.96              | 2.91                |
|                | 90     | 73.81              | 60.81                | 12.22             | 4.98                |
| HillSlope      |        | 0.34               | 0.20                 | 0.34              | 0.53                |
| 95% CI         |        | 0.7 - 2.4          | 0.5 - 1.4            | 0.7 - 2.3         | 0.8 - 3.3           |
| R <sup>2</sup> |        | 0.88               | 0.83                 | 0.87              | 0.88                |

# *Stress gene responses in amphipods to cadmium*

## Figure captions

**Figure 1.** Concentration-mortality relationships for CdCl<sub>2</sub> in the different amphipod species. Symbols represent the observed % mortality at a certain CdCl<sub>2</sub> concentration in a single treatment. Solid lines represent the regression curves fitted with the HILL model (eq. 1) and dashed lines the 95% confidence intervals.

**Figure 2.** Levels of conjugated dienes (CD; nmol g<sup>-1</sup> wet weight) in the different amphipod species upon exposure to 5 mg/L CdCl<sub>2</sub> that correspond to the species-specific LCx values given under each species name. Depicted are means (symbols) and standard deviations (bars) in the CdCl<sub>2</sub> exposed animals. The control levels are shown as dotted (mean) and dashed (standard deviations) lines. Significant differences between treatments and respective controls are indicated by \* (p< 0.05).

**Figure 3.** *Hsp70* transcript levels in tissue of the different amphipod species upon exposure to CdCl<sub>2</sub> for 1, 6 and 24 hrs. CdCl<sub>2</sub> concentrations were scaled to the species-specific LCx values (refer to Table 1 for the LCx equivalences in mg/L). a) Depicted are mean *hsp 70* expression levels (symbols) and standard deviations (bars) in CdCl<sub>2</sub> exposed animals. Expression levels in controls are shown as dotted (mean) and dashed (standard deviations) lines. Significant differences between treatments and respective controls are indicated by \* (p< 0.05). b) The *hsp 70* expression level data of all species were combined and are depicted in relation to the correspondent species-specific LCx value. The regression line was fitted over all data with the Gaussian distribution model (eq. 2).

**Figure 4.** Hsp70 protein levels in tissue of the different amphipod species upon exposure to 5 mg/L CdCl<sub>2</sub> for 1, 6 and 24 hrs. CdCl<sub>2</sub> concentrations were scaled to the species-specific LCx values. Depicted are mean Hsp70 expression levels (symbols) and

# *Stress gene responses in amphipods to cadmium*

standard deviations (bars) in CdCl<sub>2</sub> exposed animals. Expression levels in controls are shown as dotted (mean) and dashed (standard deviations) lines. Significant differences between treatments and respective controls are indicated by \* (p< 0.05). The regression line was fitted with the Gaussian distribution model (eq. 2).

**Figure 5.** Relative *abcb1* levels in amphipods upon exposure to CdCl<sub>2</sub> for 1, 6 and 24 hrs. CdCl<sub>2</sub> concentrations were scaled to the species-specific LCx values. Depicted are mean *abcb1* levels (symbols) and standard deviations (bars) in CdCl<sub>2</sub> exposed animals. Expression levels in controls are shown as dotted (mean) and dashed (standard deviations) lines. Significant differences between treatments and respective controls are indicated by \* (p< 0.05).

**Data accessibility statement:** All raw data can be obtained from the authors upon request.

Figures

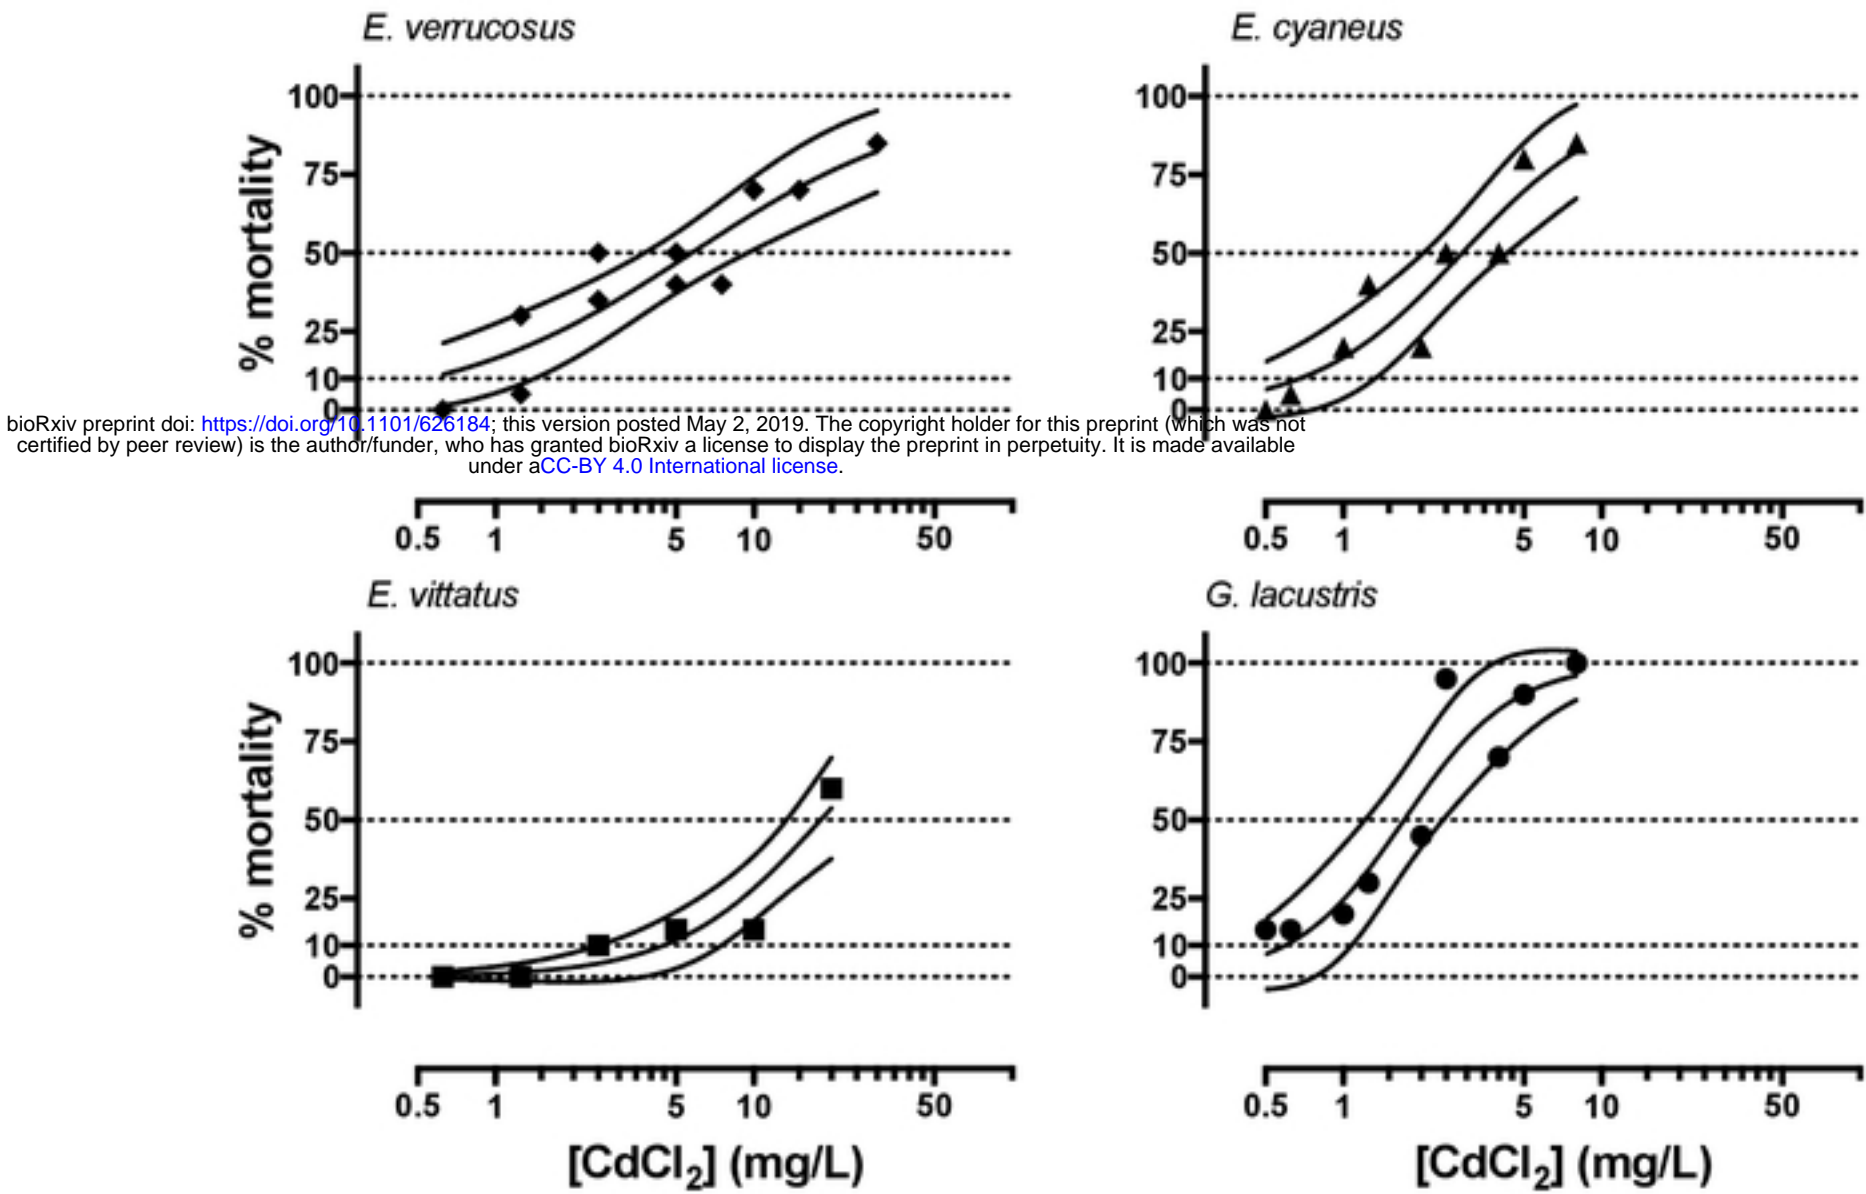

Figure 1.

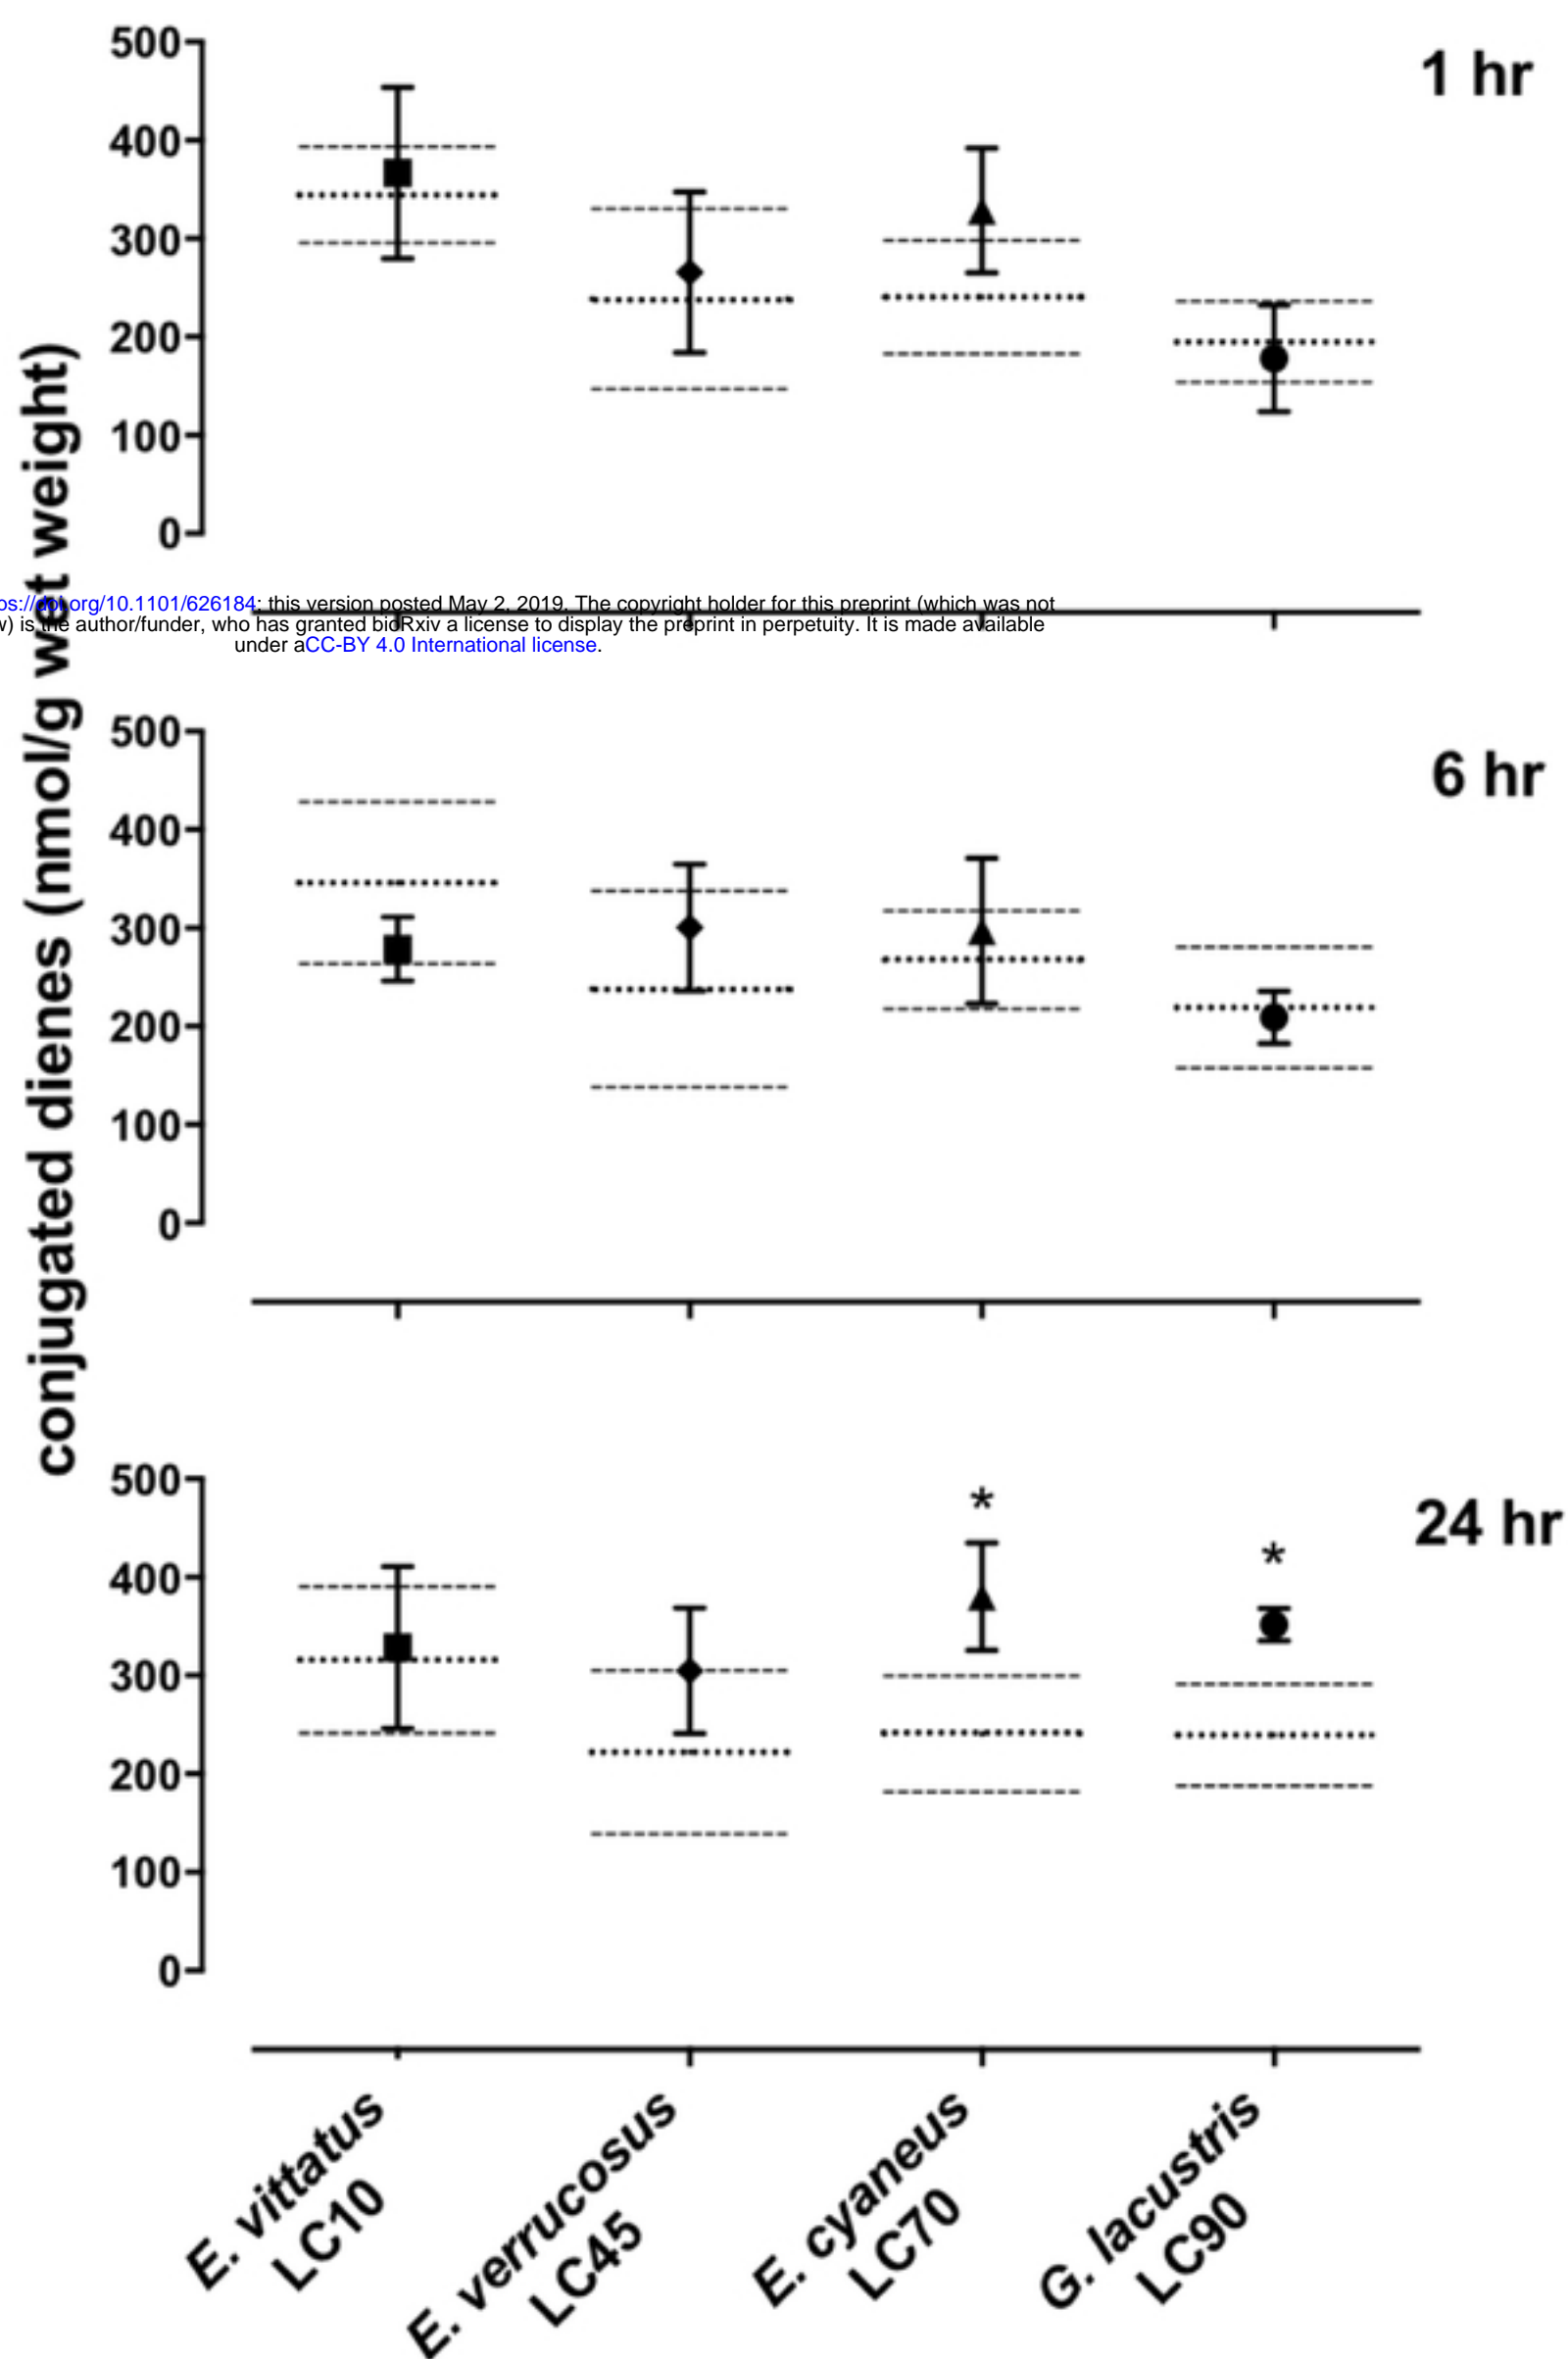

Figure 2.

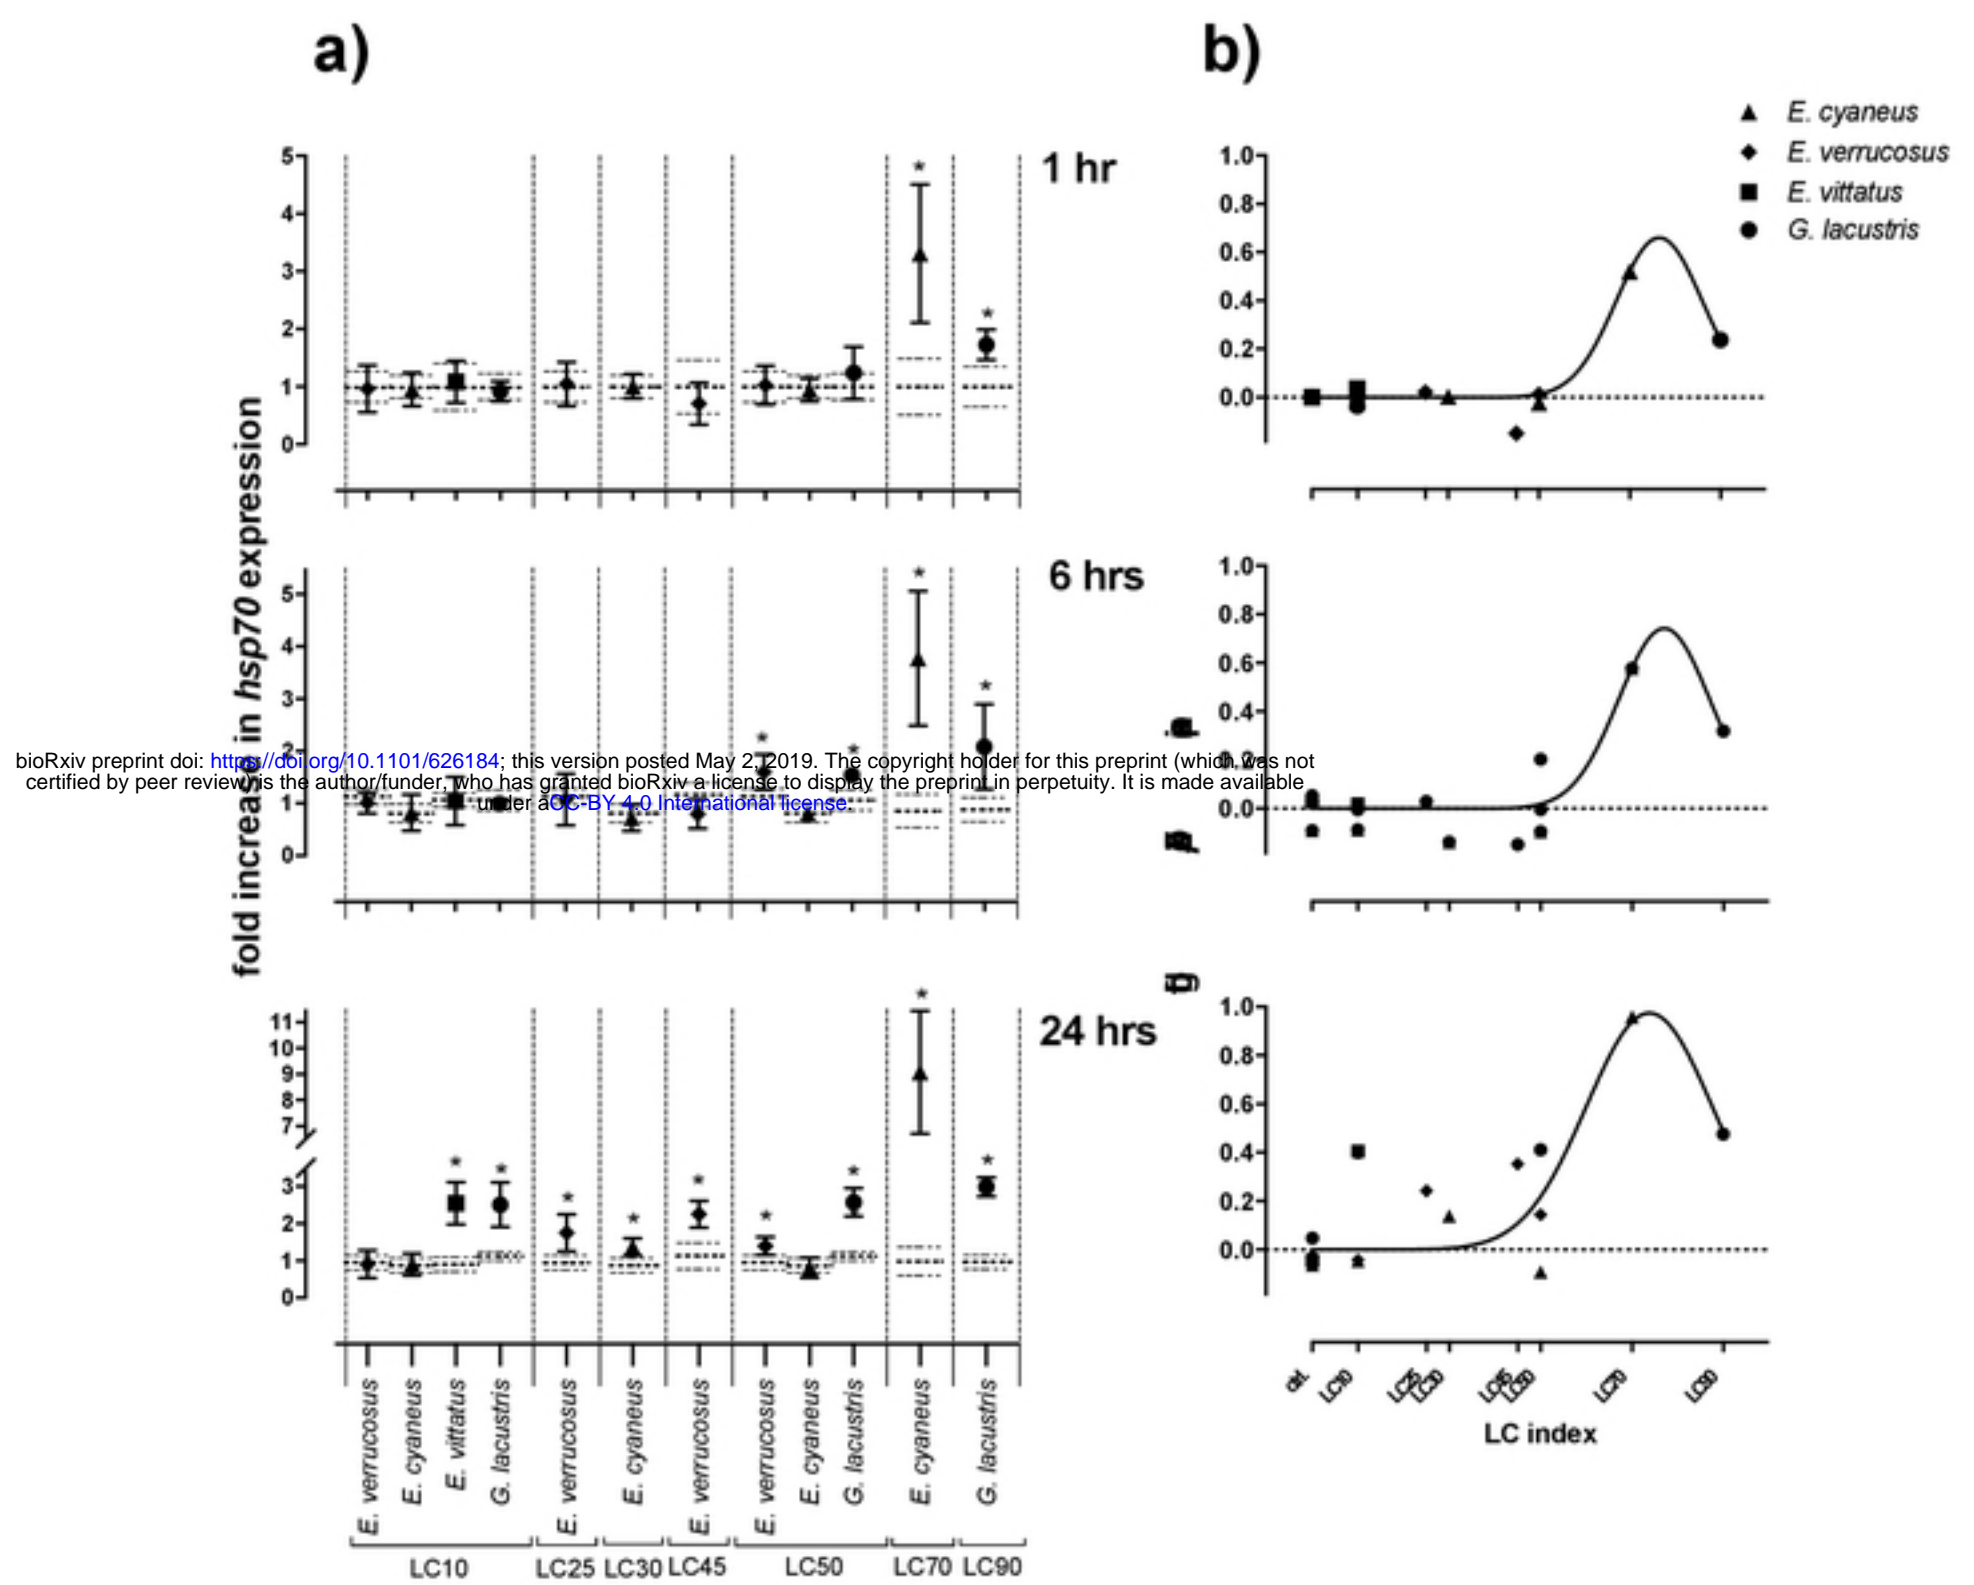

**Figure 3.**

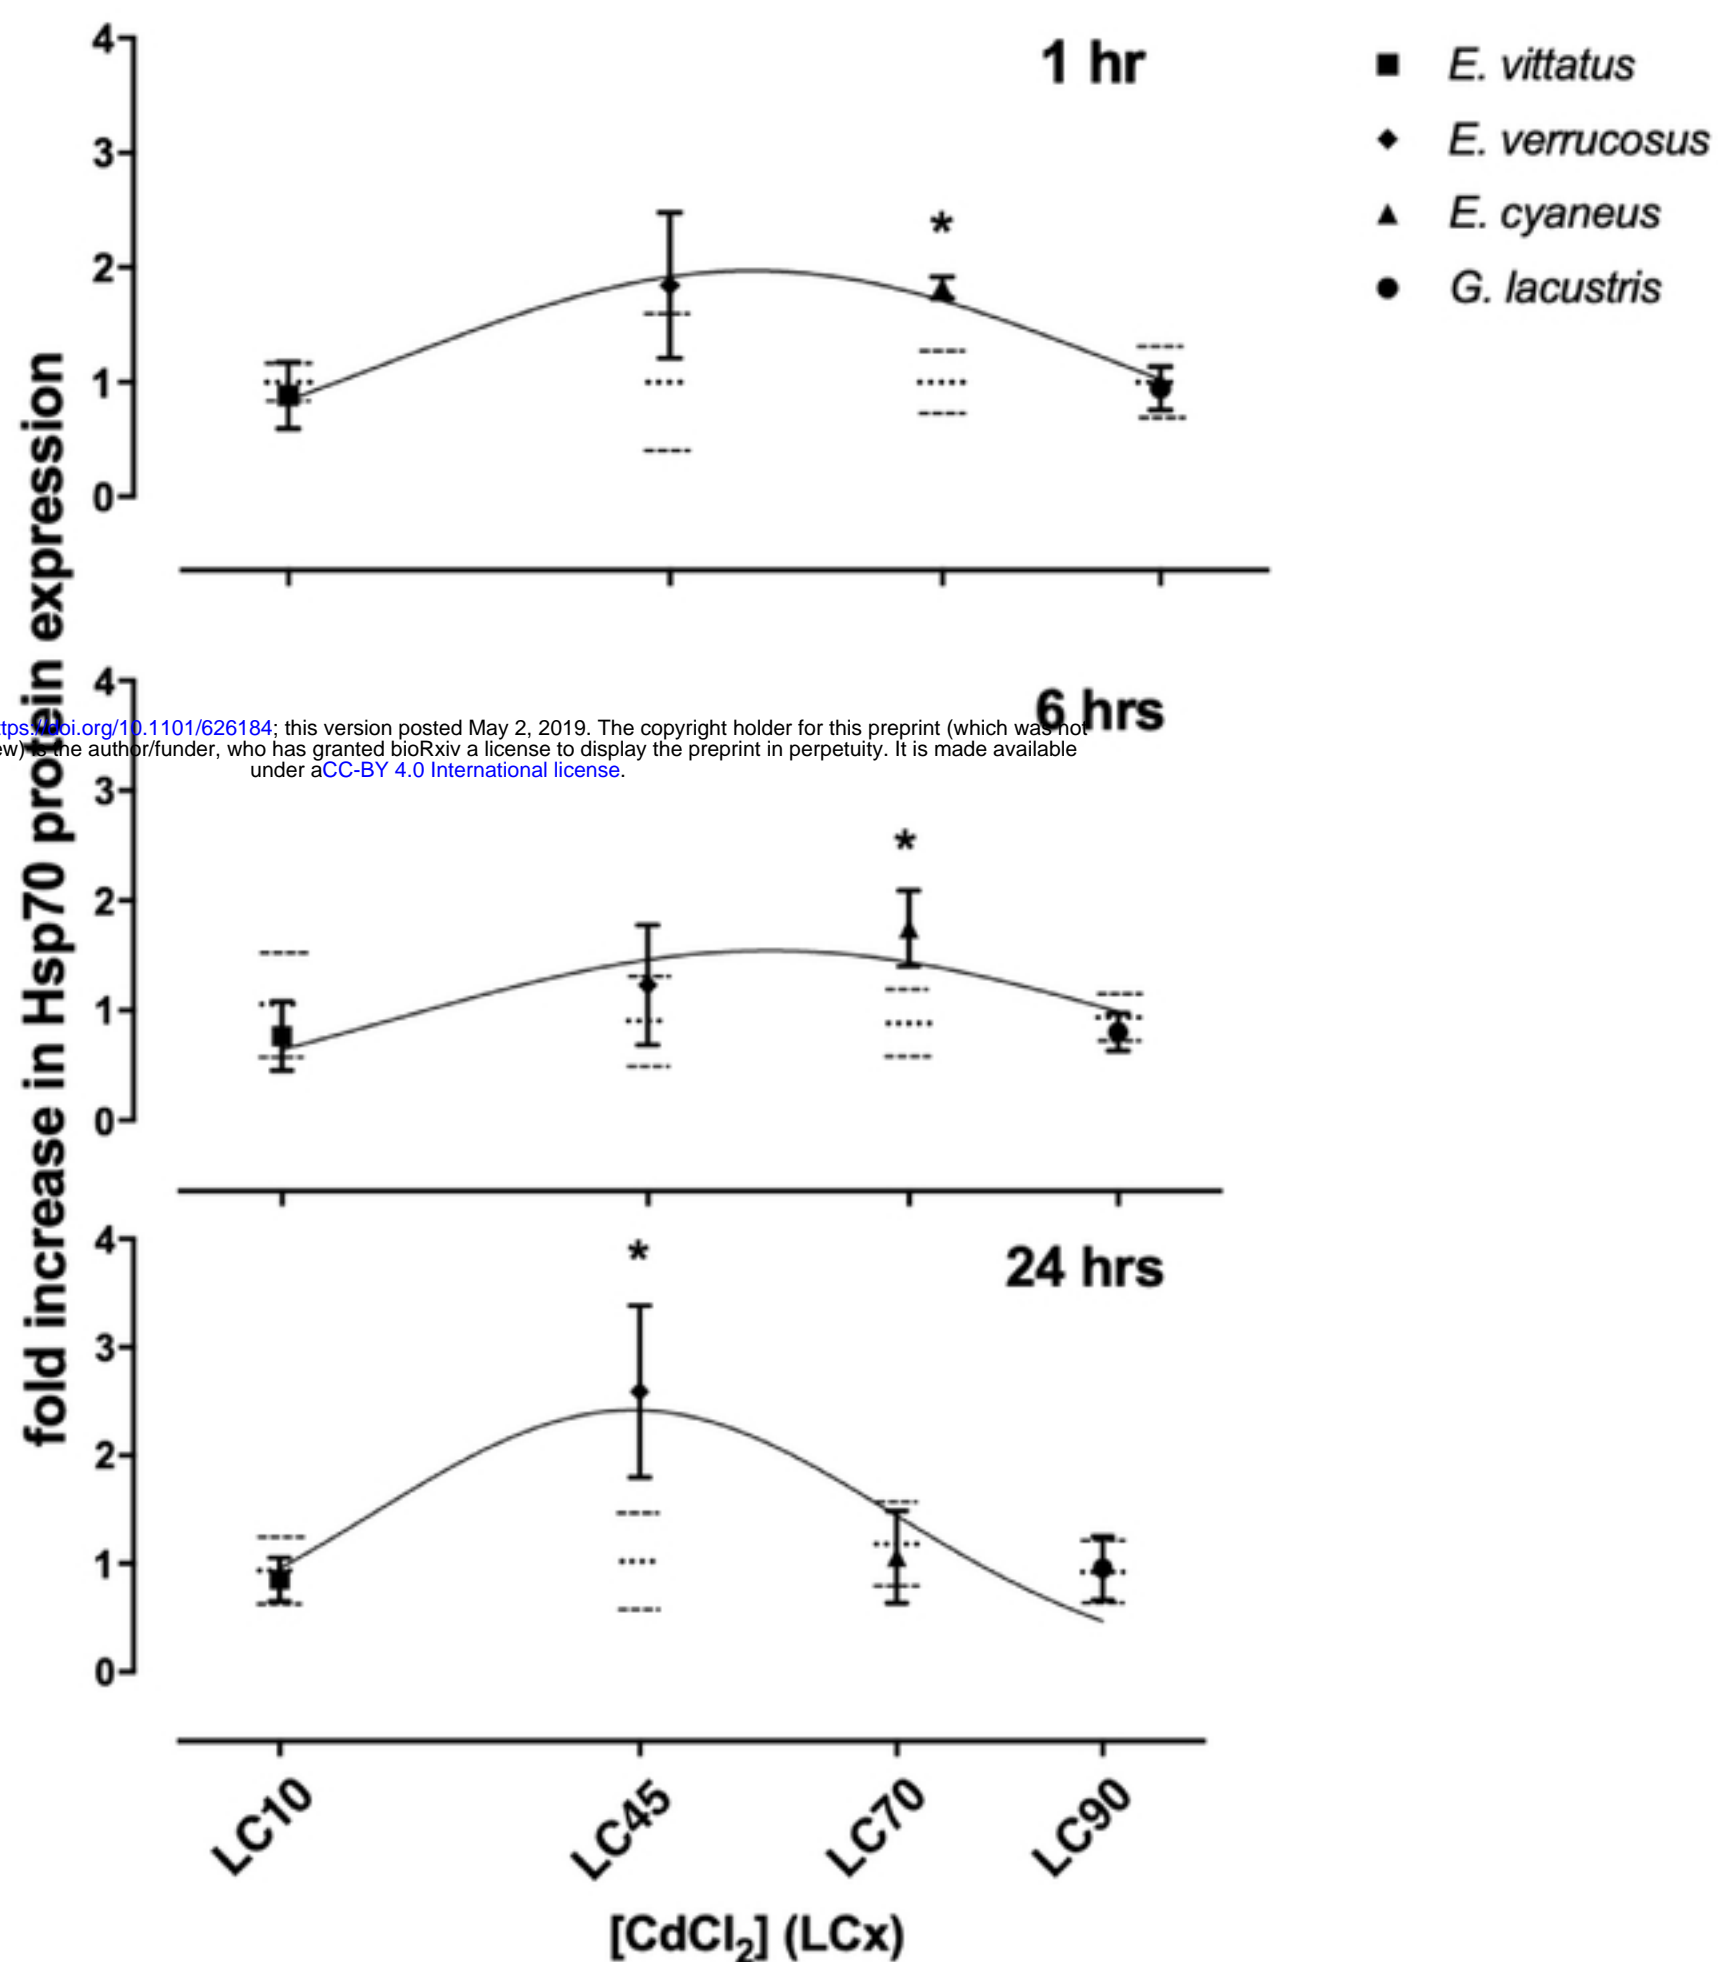

**Figure 4.**



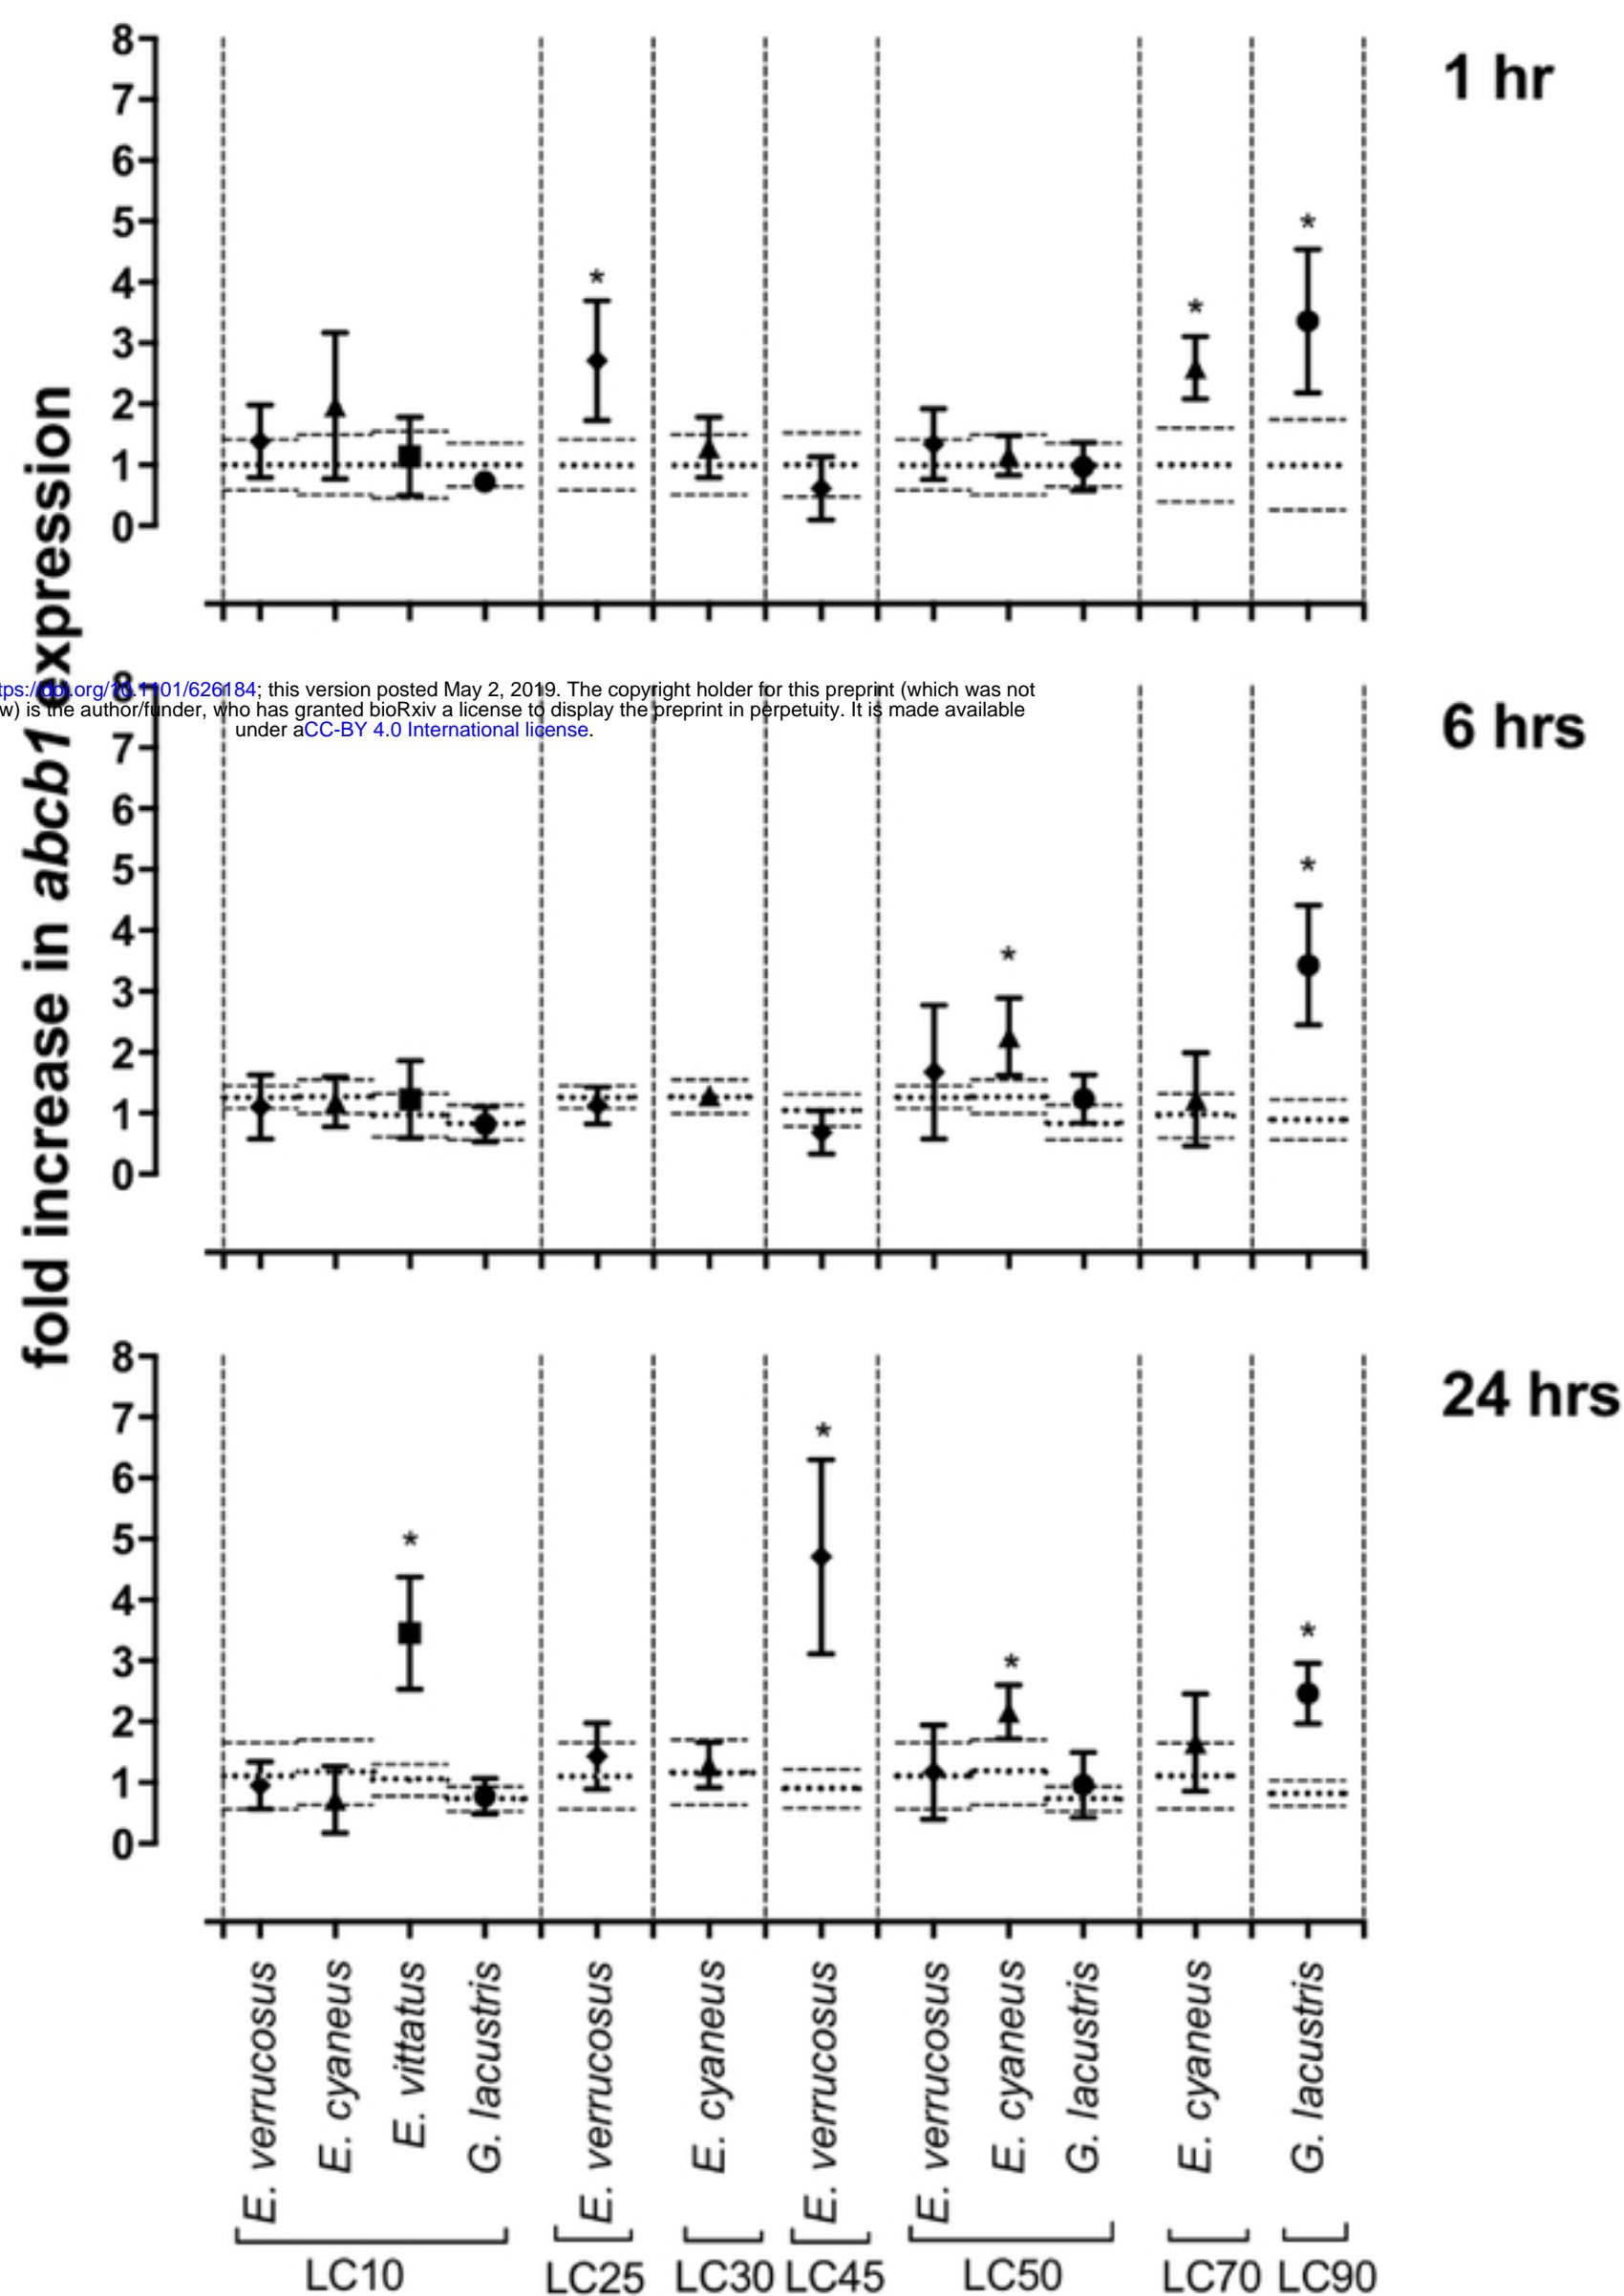

**Figure 5.**
